# Supplementary material
Source: HighWire-hosted journal article supplement (https://www.cmajopen.ca/highwire/filestream/90599/field_highwire_adjunct_files/1/open-2022-0235-original-submission.pdf)
Supplement: open-2022-0235-original-submission.pdf [file open-2022-0235-original-submission.pdf]

1  
2  
3  
4 **Development, Validation and Application of a Machine Learning Algorithm to Standardize**  
5 **Antibiotic Prescribing Records in a pan-Canadian Primary Care EMR Database: Describing**  
6 **Patterns of Pediatric Antibiotic Prescribing**  
7  
8  
9  
10  
11

12 **Authors**

13 Stephanie Garies<sup>1</sup>, PhD; Matt Taylor<sup>2</sup>; Boglarka Soos<sup>1</sup>, MMath; Cliff Lindeman<sup>2,3</sup>, PhD; Neil  
14 Drummond<sup>1,2,4</sup>, PhD; Anh Pham<sup>3</sup>, PhD; Zhi Aponte-Hao<sup>4</sup>, MSc; Tyler Williamson<sup>4,5</sup>, PhD  
15  
16  
17

18 **Affiliations:**

19 <sup>1</sup>Department of Family Medicine, University of Calgary; <sup>2</sup>Department of Family Medicine, University  
20 of Alberta; <sup>3</sup>Department of Physical Therapy, University of Alberta; <sup>4</sup>Department of Community  
21 Health Sciences, University of Calgary; <sup>5</sup>Centre for Health Informatics, University of Calgary.  
22  
23  
24

25 **Corresponding Author:** Dr. Tyler Williamson

26 5E 30, TRW Building, 3280 Hospital Drive NW, Calgary, Alberta, Canada T2N 4Z6

27 Email: [tyler.williamson@ucalgary.ca](mailto:tyler.williamson@ucalgary.ca)  
28  
29  
30

31 **Competing Interests:** The authors have no competing interests relevant to this article to disclose.  
32  
33

34 **Funding:** This study received funding from the Alberta Children's Hospital Research Institute Health  
35 Outcomes Theme (Collaborative Research Initiative Grant). The funder had no role in the design and  
36 conduct of the study.  
37  
38  
39  
40  
41  
42  
43  
44  
45  
46  
47  
48  
49  
50  
51  
52  
53  
54  
55  
56  
57  
58  
59  
60

1  
2  
3  
4  
5  
6  
7  
8  
9  
10  
11  
12  
13  
14  
15  
16  
17  
18  
19  
20  
21  
22  
23  
24  
25  
26  
27  
28  
29  
30  
31  
32  
33  
34  
35  
36  
37  
38  
39  
40  
41  
42  
43  
44  
45  
46  
47  
48  
49  
50  
51  
52  
53  
54  
55  
56  
57  
58  
59  
60

## Abstract

### Background

Most antibiotics dispensed by community pharmacies in Canada are prescribed by family physicians. Primary care electronic medical records (EMR) are an important source for understanding antibiotic prescribing patterns. Using EMR data for secondary purposes can be challenging due to variable data quality. This study used antibiotic prescriptions as an exemplar to investigate a machine learning approach for cleaning and coding antibiotic prescription data in a pan-Canadian primary care EMR database.

### Methods

There were 16,119 unique prescription names in any antibiotic category in the Canadian Primary Care Sentinel Surveillance Network database. A semi-supervised classification model was developed using reference standard labels derived from the Health Canada Drug Product Database. The resulting Anatomical Therapeutic Chemical codes assigned to the medication records were verified manually to determine whether the algorithm correctly classified the medication.

### Results

Overall, the algorithm performed very well compared to the reference standard (sensitivity 99.5%, specificity 92.4%, PPV 98.6%, NPV 97.0%). In a pediatric cohort receiving at least one antibiotic prescription from their primary care provider at any time (N=312,739), just over half were male (51.1%) and most lived in an urban setting (78.4%). Penicillins were the most prescribed type of antibiotic in the previous year (56.2% of all antibiotics prescribed to pediatric patients), with antibiotic prescribing generally decreasing since 2016.

### Interpretation

Machine learning is a novel way to accurately standardize prescribing records from large primary care EMR datasets. Access to cleaned EMR data can support important secondary uses, including community-based antibiotic prescribing surveillance and practice improvement.



1  
2 26 The primary objective of this study was therefore to build and validate a machine-learning tool to  
3  
4 27 structure and code antibiotic prescription data in a pan-Canadian primary care EMR database. Our  
5  
6 28 secondary objective was to describe the patterns of antibiotic prescribing for a pediatric population in  
7  
8  
9 29 primary care using the newly classified antibiotic medication data. This work aims to provide a  
10  
11 30 fundamental first step towards building an antibiotic prescribing surveillance system for Canada by  
12  
13 31 improving the quality of prescribed medication data available for population health surveillance,  
14  
15 32 practice quality improvement studies and clinical research. It also serves to demonstrate an efficient  
16  
17  
18 33 and effective process for improving EMR data quality in general.  
19

20 34

## 22 35 **Methods**

24 36

### 27 37 *Data source*

28  
29 38 The Canadian Primary Care Sentinel Surveillance Network (CPCSSN) began in 2008 with a mandate  
30  
31 39 to build a repository of de-identified primary care EMR data available for research, surveillance and  
32  
33 40 quality improvement<sup>4,9</sup> CPCSSN currently extracts EMR data from over 1,400 sentinel family  
34  
35 41 practices across Canada, including longitudinal information from nearly two million Canadians. The  
36  
37 42 CPCSSN data included in this study were collected within seven provinces – British Columbia,  
38  
39 43 Alberta, Manitoba, Ontario, Quebec, Nova Scotia and Newfoundland and Labrador. The data for this  
40  
41 44 study were extracted from 12 different EMR systems on June 30, 2020 as part of CPCSSN's routine  
42  
43 45 biannual extractions. Included are patient demographics, physical measurements (e.g., height, weight,  
44  
45 46 blood pressure), prescribed medications, symptoms and diagnoses recorded during patient visits, billing  
46  
47 47 claims, and laboratory results.<sup>8,10,11</sup> Extensive cleaning, coding, and processing algorithms have been built  
48  
49 48 specifically for the CPCSSN dataset to manage variable data quality, since EMRs are designed for  
50  
51 49 direct patient care and not for secondary purposes.<sup>8,10,11</sup> For example, medication data were previously  
52  
53 50 standardized using a simple pattern-matching approach that assigned codes to medication names using  
54  
55  
56  
57  
58  
59  
60

1  
2 51 the Anatomical Therapeutical Chemical (ATC) Classification system.<sup>12</sup> Whilst this approach is  
3  
4 52 effective, it is cumbersome and expensive to implement and update regularly. Our study used all  
5  
6 53 medication data within the CPCSSN database (approximately 42 million records containing 2.4 million  
7  
8  
9 54 unique medication names), which included records dating from 1981 up to 2020, although most  
10  
11 55 medication records (95%) were from 2008 onwards.  
12

13 56  
14  
15 57 For the machine learning-based classifier developed for this study, the Health Canada Drug Product  
16  
17  
18 58 Database (DPD)<sup>13</sup> was used as the reference standard to which all prescription medications in the  
19  
20 59 CPCSSN database were mapped. The DPD, which is updated nightly, contains all drug products  
21  
22 60 approved for human use in Canada and is available in comma-separated values (CSV) format from the  
23  
24  
25 61 Health Canada website.<sup>13</sup>  
26

### 27 62 28 29 63 *Machine learning model*

30  
31  
32 64 The *FastText* open-source library (version 0.9.2) was used to develop the machine learning model for  
33  
34 65 cleaning and coding the unstructured prescribing text in the CPCSSN database.<sup>14,15</sup> *FastText* was  
35  
36 66 selected for its efficiency when using standard computing infrastructure, as well as its ability to  
37  
38  
39 67 leverage morphemes, such as prefixes or suffixes, when training word embedding models. A large  
40  
41 68 corpus of uncoded medication name text ( $n=2,419,786$ ) selected from the CPCSSN database to include  
42  
43 69 all antibiotic medications was used to train a skip-gram word representation model; this approach aims  
44  
45 70 to predict the context (or surrounding) words given a target word. This was then used to build a semi-  
46  
47  
48 71 supervised classification model using multinomial logistic regression, with labels derived from the  
49  
50 72 Health Canada DPD. The training dataset ( $n=151,296$  records) included values sourced from the DPD,  
51  
52 73 such as brand and generic names, in addition to medication names in the CPCSSN database that had  
53  
54 74 been previously coded to a relatively high degree of accuracy using simple pattern and prefix matching  
55  
56  
57 75 from the DPD. We iteratively refined the model through 5 rounds of review. At each round the team  
58  
59  
60

1  
2 76 was engaged to evaluate whether the model was appropriate and to review sources of potential  
3  
4 77 disagreement between the classification from the model and the reference standard.  
5

6  
7 78

### 8 9 79 *Validation*

10  
11 80 All 16,119 unique prescription names present in any antibiotic category were drawn from the CPCSSN  
12  
13 81 data; this accounted for 159 unique ATC codes for antibiotics. After the algorithm was applied to the  
14  
15 82 data, a trained reviewer manually reviewed each of the 16,119 prescription instances to confirm  
16  
17 83 whether it had assigned the correct ATC code, given the medication name, strength, dose, frequency,  
18  
19 84 and route information available in the original record. In the case where the reviewer was unsure  
20  
21 85 whether the match was correct, a consensus was sought with two other study members. The sensitivity,  
22  
23 86 specificity, positive predictive and negative predictive values were calculated, comparing the  
24  
25 87 algorithm-derived output to the reviewer's verification.  
26  
27  
28

29  
30 88

### 31 32 89 *Statistical analysis*

33  
34 90 A descriptive analysis was then used to understand antibiotic prescribing rates among a pediatric  
35  
36 91 population aged 18 years and younger in the national CPCSSN database. Age groups were calculated  
37  
38 92 using year of birth, sex was described as reported in the patient EMR, residence was categorized as  
39  
40 93 rural if the second digit of the patient postal code was equal to 0 and urban if the second digit was  
41  
42 94 greater than 0, thus adhering to Canada Post's own urban or rural classification. Antibiotic medications  
43  
44 95 were defined according to ATC code groups representing antibiotics (full list of codes in  
45  
46 96 Supplementary Table 1). *PostgreSQL 11* was used for the descriptive analysis.  
47  
48  
49

50  
51 97

### 52 53 98 *Ethics approval*

54  
55 99 This study received approval from the Conjoint Health Research Ethics Board at the University of  
56  
57 100 Calgary (REB20-1316).  
58

59  
60

## Results

Figure 1 reports the validity of the machine learning algorithm as compared to manual review of each prescription record (i.e., whether the record was assigned the correct ATC code). Overall, the algorithm performed very well compared to the reference standard, with sensitivity 99.5%, specificity 92.4%, PPV 98.6% and NPV 97.0%. In total, there were 270 records that were inaccurately classified (false positives and false negatives). In a simple post-hoc analysis of these 270 records, we found that some did not refer to antibiotics, some were misclassified as a different antibiotic, and some were the wrong medication entirely.

Table 1 summarizes the demographic characteristics of the pediatric cohort (N=312,739). Among those who had received at least one antibiotic prescription at any time from their primary care provider, most were male (51.1%) and living in an urban setting (78.4%). Penicillins were the most prescribed type of antibiotic (56.2%) (Table 1), with antibiotic prescribing in general decreasing since 2016 (Figure 2).

## Interpretation

This study presents a method for cleaning, coding, and standardizing prescribed medication records in a primary care EMR database. The machine learning-based classifier accurately mapped the unstructured information in the EMR to the correct entry in the DPD. We also present the antibiotic prescribing patterns among pediatric patients who had an encounter with a primary care provider who contributed to the CPCSSN database. We focused this work on antibiotic prescribing, as it is a common activity in primary care and is also one of the more complex prescription records, in terms of having several medication classes, multiple routes (e.g., creams, pills), and is often compounded with other medications. This new method will be used to expand our standardization processes to include other types of medications in the CPCSSN database. Since machine learning is highly dependent on the

1  
2 126 training data used, our access to a large pan-Canadian data source reinforces confidence that this  
3  
4 127 method will be able to accurately classify additional medication data from various regions and different  
5  
6 128 EMR systems. With the use of Health Canada's DPD as the reference standard, this ensures that newly  
7  
8  
9 129 approved medications will be immediately included in our classifier in the future.  
10

11 130  
12  
13 131 The trends in pediatric antibiotic prescribing were not surprising, with seasonal fluctuations and an  
14  
15  
16 132 overall decrease in prescribing rates over the previous four years. This is consistent with patterns  
17  
18 133 observed in other countries<sup>16,17</sup> and reflects the significant efforts of the national Choosing Wisely  
19  
20 134 campaign to reduce antibiotic prescribing.<sup>18</sup> Further, antibiotic prescribing may have trailed off as a  
21  
22  
23 135 result of the COVID-19 pandemic possibly due to a reduction in conditions requiring antibiotics or  
24  
25 136 through decreased visits to family physicians.  
26

27 137  
28  
29  
30 138 The use of coded EMR data from primary care practices provides a novel and efficient way to conduct  
31  
32 139 antibiotic prescribing and other health surveillance in Canada. In the future, we may link regional  
33  
34 140 CPCSSN data with administrative health data, such as PIN, to create more robust datasets that capture a  
35  
36  
37 141 more complete trajectory of diagnoses, prescriptions, and dispensed medications. This work will also  
38  
39 142 inform the development of machine learning methods to code and classify the rest of the prescribed  
40  
41 143 medication data in CPCSSN, as well as other types of data in EMRs such as diagnoses, medical  
42  
43 144 procedures and referrals. The potential of this approach to improve EMR data quality for almost every  
44  
45  
46 145 secondary purpose is clearly significant.  
47

48 146  
49  
50 147 *Limitations*  
51

52 148 While CPCSSN is a unique data source for national pharmacoepidemiology, it is not without  
53  
54  
55 149 limitations. It does not include all practices, providers or patients, rather it is a sample of providers  
56  
57 150 willing to contribute de-identified EMR data for surveillance and research. Generally, the CPCSSN  
58



1  
2 151 database is reasonably representative of patients (with slight over-representation of females and older  
3  
4 152 adults) and providers (who are more often younger, female and in an academic practice).<sup>19</sup> Secondly,  
5  
6 153 the machine learning algorithm developed here may not be directly portable to other data sources or  
7  
8  
9 154 settings; however, given that 12 different primary care EMR systems were included in this database,  
10  
11 155 from several provincial contexts, we are relatively confident in the robustness of the model. Lastly, the  
12  
13 156 machine learning model only classifies prescribed medications listed on the DPD. There may be other  
14  
15  
16 157 non-prescription medications in the medication table, as well as notes unrelated to medications (e.g.,  
17  
18 158 compression stockings, massage therapy recommendation, etc.), that would not be classified using this  
19  
20 159 approach.  
21  
22  
23 160

### 24 25 161 *Conclusion*

26  
27 162 We developed a machine learning algorithm that classifies unstructured antibiotic medication data from  
28  
29 163 primary care with a high degree of accuracy. When applied to the national CPCSSN database, this will  
30  
31  
32 164 help to provide more robust data for pharmacoepidemiology, research and clinical quality  
33  
34 165 improvement, and will be transferrable to other conditions and other data in the record.  
35  
36 166  
37  
38  
39 167

## References

1. Canadian Institute for Health Information (CIHI). National prescription drug utilization information system [Internet]. 2019 [cited 2022 Apr 4]. Available from: <https://www.cihi.ca/en/national-prescription-drug-utilization-information-system-metadata>
2. Alberta Health Analytics and Performance Reporting Branch. Overview of administrative health datasets [Internet]. 2017 [cited 2022 Apr 4]. Available from: <https://open.alberta.ca/dataset/657ed26d-eb2c-4432-b9cb-0ca2158f165d/resource/38f47433-b33d-4d1e-b959-df312e9d9855/download/research-health-datasets.pdf>
3. Canadian Medical Association. CMA Workforce Study 2017 [Internet]. 2017 [cited 2022 Sep 3]. Available from: [http://cma.andornot.com/SurveyPDF/CMA\\_Survey\\_Workforce2017\\_Q22\\_ElectronicRecords-e.pdf](http://cma.andornot.com/SurveyPDF/CMA_Survey_Workforce2017_Q22_ElectronicRecords-e.pdf)
4. Birtwhistle R, Williamson T. Primary care electronic medical records: A new data source for research in Canada. *CMAJ*. 2015;187(4):239–40.
5. Public Health Agency of Canada (PHAC). Canadian antimicrobial resistance surveillance system 2017 report [Internet]. Ottawa, ON; 2017 [cited 2022 Jan 28]. Available from: <https://www.canada.ca/en/public-health/services/publications/drugs-health-products/canadian-antimicrobial-resistance-surveillance-system-2017-report-executive-summary.html>
6. Principi N, Esposito S. Antimicrobial stewardship in paediatrics. *BMC Infect Dis*. 2016;16:424.
7. Kronman M, Zhou C, Mangione-Smith R. Bacterial prevalence and antimicrobial prescribing trends for acute respiratory tract infections. *Pediatrics*. 2014;134(4):e956.
8. Garies S, Cummings M, Forst B, McBrien K, Soos B, Taylor M, et al. Achieving quality primary care data: a description of the Canadian Primary Care Sentinel Surveillance Network data capture, extraction, and processing in Alberta. *Int J Popul Data Sci*. 2019;4(2).
9. Birtwhistle R, Keshavjee K, Lambert-Lanning A, Godwin M, Greiver M, Manca D, et al. Building a pan-Canadian primary care sentinel surveillance network: Initial development and moving forward. *J Am Board Fam Med*. 2009;22(4):412–22.
10. Garies S, Birtwhistle R, Drummond N, Queenan J, Williamson T. Data Resource Profile: National electronic medical record data from the Canadian Primary Care Sentinel Surveillance Network (CPCSSN). *Int J Epidemiol*. 2017;46(4):1091-1092f.
11. Williamson T, Green ME, Birtwhistle R, Khan S, Garies S, Wong ST, et al. Validating the 8 CPCSSN case definitions for chronic disease surveillance in a primary care database of electronic health records. *Ann Fam Med*. 2014;12(4):367–72.
12. World Health Organization. WHO Collaborating Centre for Drug Statistics Methodology, ATC classification index with DDDs, 2018 [Internet]. Oslo, Norway. 2017 [cited 2017 Nov 30]. Available from: <https://www.whocc.no/atc/>
13. Health Canada. Drug Product Database [Internet]. 2015 [cited 2022 Jan 28]. Available from: <https://www.canada.ca/en/health-canada/services/drugs-health-products/drug-products/drug-product-database.html>
14. Facebook I. fastText: Library for fast text representation and classification [Internet]. 2016 [cited 2022 Feb 1]. Available from: <https://github.com/facebookresearch/fastText>
15. Joulin A, Grave E, Bojanowski P, Mikolov T. Bag of tricks for efficient text classification. *arXiv*. 2016;
16. Holstiege J, Schink T, Molokhia M, Mazzaglia G, Innocenti F, Oteri A, et al. Systemic

- 1  
2 antibiotic prescribing to paediatric outpatients in 5 European countries: A population-  
3 based cohort study. *BMC Pediatr.* 2014;14:174.  
4 17. Suda KJ, Hicks LA, Roberts RM, Hunkler RJ, Taylor TH. Trends and seasonal variation  
5 in outpatient antibiotic prescription rates in the united states, 2006 to 2010. *Antimicrob*  
6 *Agents Chemother.* 2014;58(5):2763–6.  
7 18. Choosing Wisely Canada. Using antibiotics wisely [Internet]. [cited 2022 Feb 25].  
8 Available from: <https://choosingwiselycanada.org/campaign/antibiotics/>  
9  
10 19. Queenan JA, Williamson T, Khan S, Drummond N, Garies S, Morkem R, et al.  
11 Representativeness of patients and providers in the Canadian Primary Care Sentinel  
12 Surveillance Network: a cross-sectional study. *CMAJ Open.* 2016;4(1):e28–32.  
13  
14  
15  
16  
17  
18  
19  
20  
21  
22  
23  
24  
25  
26  
27  
28  
29  
30  
31  
32  
33  
34  
35  
36  
37  
38  
39  
40  
41  
42  
43  
44  
45  
46  
47  
48  
49  
50  
51  
52  
53  
54  
55  
56  
57  
58  
59  
60

Confidential

1  
2  
3  
4  
5  
6  
7  
8  
9  
10  
11  
12  
13  
14  
15  
16  
17  
18  
19  
20  
21  
22  
23  
24  
25  
26  
27  
28  
29  
30  
31  
32  
33  
34  
35  
36  
37  
38  
39  
40  
41  
42  
43  
44  
45  
46  
47  
48  
49  
50  
51  
52  
53  
54  
55  
56  
57  
58  
59  
60

## Acknowledgements

We wish to thank Ms. Sara Alvarado for her assistance with the machine learning validation process. We are also grateful to all primary care providers and patients who contribute to the CPCSSN database across Canada.

## Data Sharing

The CPCSSN database is accessible to researchers for approved uses. To submit a data access request or to find out more about the data access fees, data dictionary, and other information, visit: <http://cpcssn.ca/dar/>

## Abbreviations

|        |                                                           |
|--------|-----------------------------------------------------------|
| ATC    | Anatomical Therapeutic Chemical (classification)          |
| CPCSSN | Canadian Primary Care Sentinel Surveillance Network       |
| CSV    | Comma-Separated Values                                    |
| DPD    | Drug Product Database                                     |
| EMR    | Electronic Medical Record                                 |
| NPDUIS | National Prescription Drug Utilization Information System |
| NPV    | Negative Predictive Value                                 |
| PIN    | Pharmaceutical Information Network                        |
| PPV    | Positive Predictive Value                                 |

**Table 1.** Demographic characteristics and antibiotic prescriptions for pediatric patients receiving at least one antibiotic prescription within primary care practices in Canada.

| Characteristics                                                | Number of patients, n (%)<br>N=312,739 |
|----------------------------------------------------------------|----------------------------------------|
| Age group (in years)                                           |                                        |
| 0-4                                                            | 55,449 (17.7)                          |
| 5-9                                                            | 93,117 (29.8)                          |
| 10-14                                                          | 94,465 (30.2)                          |
| 15-18                                                          | 69,708 (22.3)                          |
| Sex                                                            |                                        |
| Female                                                         | 152,468 (48.8)                         |
| Male                                                           | 159,939 (51.1)                         |
| <i>Missing sex</i>                                             | 332 (0.1)                              |
| Residence*                                                     |                                        |
| Rural                                                          | 52,238 (16.7)                          |
| Urban                                                          | 245,244 (78.4)                         |
| <i>Missing postal code</i>                                     | 15,257 (4.9)                           |
| Types of antibiotics prescribed at least once in previous year |                                        |
| Any type of antibiotic                                         | 16,251 (5.2)                           |
| Penicillins                                                    | 9,132 (2.9)                            |
| Cephalosporins                                                 | 3,858 (1.2)                            |
| Macrolides                                                     | 2,106 (0.7)                            |
| Sulfonamides                                                   | 786 (0.3)                              |

\*Based on second digit of postal code, where 0=rural and >0=urban.

**Figure 1.** Confusion matrix comparing the machine learning algorithm to the reviewer confirmation of ATC-coded antibiotic medications in the CPCSSN database.

|                  |     | Human Review                 |                             |             |                          |
|------------------|-----|------------------------------|-----------------------------|-------------|--------------------------|
|                  |     | Yes                          | No                          |             |                          |
| CPCSSN Algorithm | Yes | 13,451<br>True Positive (TP) | 197<br>False Positive (FP)  | PPV<br>98.6 | Total Positive<br>13,648 |
|                  | No  | 73<br>False Negative (FN)    | 2,398<br>True Negative (TN) | NPV<br>97.0 | Total Negative<br>2,471  |
|                  |     | Sensitivity<br>99.5          | Specificity<br>92.4         |             |                          |

**Figure 2.** Antibiotic prescribing as a proportion of total medications prescribed by month for patients 18 years and younger (January 2016 to January 2020).

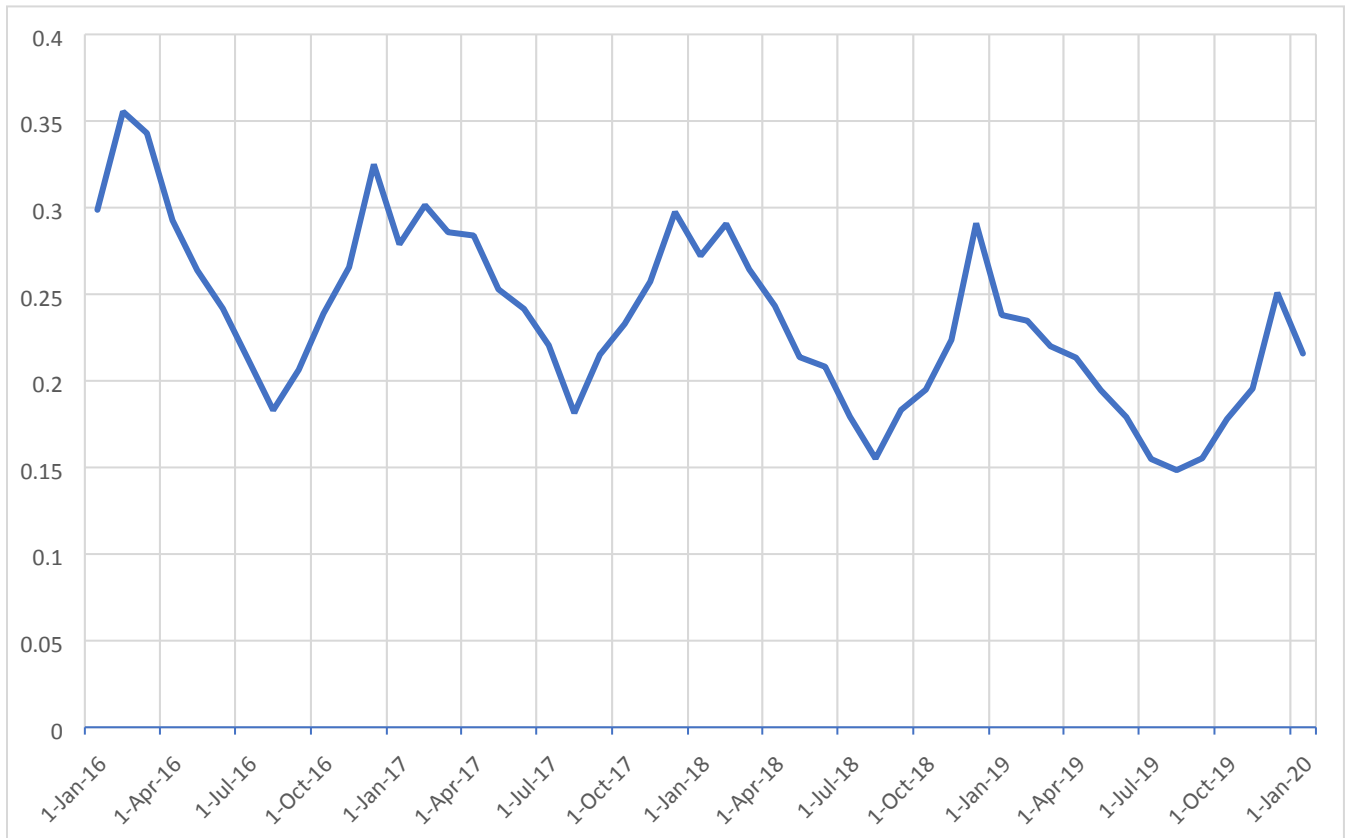

**Supplementary Table 1.** List of antibiotic-specific ATC codes.

| <u>ATC Code</u> | <u>Medication Name</u>              |
|-----------------|-------------------------------------|
| A01AB22         | Doxycycline                         |
| A01AB23         | Minocycline                         |
| A07AA02         | Nystatin                            |
| A07AA06         | Paromomycin                         |
| A07AA09         | Vancomycin                          |
| A07AA11         | Rifaximin                           |
| A07AA12         | Fidaxomicin                         |
| D06AA02         | Chlortetracycline                   |
| D06AA04         | Tetracycline                        |
| D06AX01         | Fusidic Acid                        |
| D06AX04         | Neomycin                            |
| D06AX05         | Bacitracin                          |
| D06AX07         | Gentamicin                          |
| D06AX09         | Mupirocin                           |
| D06AX13         | Retapamulin                         |
| D06AX14         | Ozenoxacin                          |
| D06AX30         | Combinations of Antibiotics         |
| D06AX55         | "Bacitracin, Combinations"          |
| D06BA01         | Silver Sulfadiazine                 |
| D06BA03         | Mafenide                            |
| D06BA51         | "Silver Sulfadiazine, Combinations" |
| D06BX01         | Metronidazole                       |
| D07CA01         | Hydrocortisone and Antibiotics      |
| D07CA02         | Methylprednisolone and Antibiotics  |
| D07CB01         | Triamcinolone and Antibiotics       |
| D07CB05         | Flumetasone and Antibiotics         |
| D07CC01         | Betamethasone and Antibiotics       |
| D07CC05         | Fluocinonide and Antibiotics        |
| D10AF01         | Clindamycin                         |
| D10AF51         | "Clindamycin, Combinations"         |
| D10AF52         | "Erythromycin, Combinations"        |
| D10AF53         | "Chloramphenicol, Combinations"     |
| G01AA01         | Nystatin                            |
| G01AA10         | Clindamycin                         |
| G01AA51         | "Nystatin, Combinations"            |
| G01AF01         | Metronidazole                       |
| J01AA01         | Demeclocycline                      |
| J01AA02         | Doxycycline                         |
| J01AA07         | Tetracycline                        |
| J01AA08         | Minocycline                         |
| J01AA09         | Rolitetracycline                    |
| J01AA12         | Tigecycline                         |
| J01BA01         | Chloramphenicol                     |
| J01CA01         | Ampicillin                          |
| J01CA02         | Pivampicillin                       |
| J01CA04         | Amoxicillin                         |
| J01CA06         | Bacampicillin                       |
| J01CA08         | Pivmecillinam                       |
| J01CA12         | Piperacillin                        |
| J01CA13         | Ticarcillin                         |
| J01CA51         | "Ampicillin, Combinations"          |
| J01CE01         | Benzylpenicillin                    |
| J01CE02         | Phenoxyethylpenicillin              |



|    |         |                                           |
|----|---------|-------------------------------------------|
| 1  |         |                                           |
| 2  |         |                                           |
| 3  | J01CE08 | Benzathine Benzylpenicillin               |
| 4  | J01CE09 | Procaine Penicillin                       |
| 5  | J01CE10 | Benzathine Phenoxymethylpenicillin        |
| 6  | J01CE30 | Combinations                              |
| 7  | J01CF   | Beta-Lactamase Resistant Penicillins      |
| 8  | J01CF02 | Cloxacillin                               |
| 9  | J01CF05 | Flucloxacillin                            |
| 10 | J01CR02 | Amoxicillin and Beta-Lactamase Inhibitor  |
| 11 | J01CR03 | Ticarcillin and Beta-Lactamase Inhibitor  |
| 12 | J01CR05 | Piperacillin and Beta-Lactamase Inhibitor |
| 13 | J01DB01 | Cefalexin                                 |
| 14 | J01DB03 | Cefalotin                                 |
| 15 | J01DB04 | Cefazolin                                 |
| 16 | J01DB05 | Cefadroxil                                |
| 17 | J01DC01 | Cefoxitin                                 |
| 18 | J01DC02 | Cefuroxime                                |
| 19 | J01DC03 | Cefamandole                               |
| 20 | J01DC04 | Cefaclor                                  |
| 21 | J01DC05 | Cefotetan                                 |
| 22 | J01DC10 | Cefprozil                                 |
| 23 | J01DD01 | Cefotaxime                                |
| 24 | J01DD02 | Ceftazidime                               |
| 25 | J01DD04 | Ceftriaxone                               |
| 26 | J01DD07 | Ceftizoxime                               |
| 27 | J01DD08 | Cefixime                                  |
| 28 | J01DD13 | Cefpodoxime                               |
| 29 | J01DE01 | Cefepime                                  |
| 30 | J01DF01 | Aztreonam                                 |
| 31 | J01DH02 | Meropenem                                 |
| 32 | J01DH03 | Ertapenem                                 |
| 33 | J01DH04 | Doripenem                                 |
| 34 | J01DH51 | Imipenem and Cilastatin                   |
| 35 | J01DI01 | Ceftobiprole Medocaril                    |
| 36 | J01DI54 | Ceftolozane and Beta-Lactamase Inhibitor  |
| 37 | J01EA01 | Trimethoprim                              |
| 38 | J01EB02 | Sulfamethizole                            |
| 39 | J01EB04 | Sulfapyridine                             |
| 40 | J01EB05 | Sulfafurazole                             |
| 41 | J01EC01 | Sulfamethoxazole                          |
| 42 | J01EC02 | Sulfadiazine                              |
| 43 | J01EE01 | Sulfamethoxazole and Trimethoprim         |
| 44 | J01EE02 | Sulfadiazine and Trimethoprim             |
| 45 | J01FA01 | Erythromycin                              |
| 46 | J01FA02 | Spiramycin                                |
| 47 | J01FA09 | Clarithromycin                            |
| 48 | J01FA10 | Azithromycin                              |
| 49 | J01FA15 | Telithromycin                             |
| 50 | J01FF01 | Clindamycin                               |
| 51 | J01FF02 | Lincomycin                                |
| 52 | J01FG02 | Quinopristin and Dalfopristin             |
| 53 | J01GA01 | Streptomycin                              |
| 54 | J01GB01 | Tobramycin                                |
| 55 | J01GB03 | Gentamicin                                |
| 56 | J01GB05 | Neomycin                                  |
| 57 | J01GB06 | Amikacin                                  |
| 58 | J01GB07 | Netilmicin                                |
| 59 |         |                                           |
| 60 |         |                                           |

Confidential

|    |         |                                                                             |
|----|---------|-----------------------------------------------------------------------------|
| 1  |         |                                                                             |
| 2  |         |                                                                             |
| 3  | J01MA01 | Ofloxacin                                                                   |
| 4  | J01MA02 | Ciprofloxacin                                                               |
| 5  | J01MA06 | Norfloxacin                                                                 |
| 6  | J01MA11 | Grepafloxacin                                                               |
| 7  | J01MA12 | Levofloxacin                                                                |
| 8  | J01MA13 | Trovafloxacin                                                               |
| 9  | J01MA14 | Moxifloxacin                                                                |
| 10 | J01MA15 | Gemifloxacin                                                                |
| 11 | J01MA16 | Gatifloxacin                                                                |
| 12 | J01MB02 | Nalidixic Acid                                                              |
| 13 | J01RA02 | "Sulfonamides, Combinations With Other Antibacterials (Excl. Trimethoprim)" |
| 14 | J01XA01 | Vancomycin                                                                  |
| 15 | J01XA03 | Telavancin                                                                  |
| 16 | J01XA04 | Dalbavancin                                                                 |
| 17 | J01XB01 | Colistin                                                                    |
| 18 | J01XB02 | Polymyxin B                                                                 |
| 19 | J01XC01 | Fusidic Acid                                                                |
| 20 | J01XD01 | Metronidazole                                                               |
| 21 | J01XE01 | Nitrofurantoin                                                              |
| 22 | J01XX01 | Fosfomycin                                                                  |
| 23 | J01XX04 | Spectinomycin                                                               |
| 24 | J01XX05 | Methenamine                                                                 |
| 25 | J01XX08 | Linezolid                                                                   |
| 26 | J01XX09 | Daptomycin                                                                  |
| 27 | J01XX10 | Bacitracin                                                                  |
| 28 | J01XX11 | Tedizolid                                                                   |
| 29 | J01XX55 | "Methenamine, Combinations"                                                 |
| 30 | J02AA01 | Amphotericin B                                                              |
| 31 | J04     | Antimycobacterials                                                          |
| 32 | J04AA02 | Sodium Aminosalicylate                                                      |
| 33 | J04AB01 | Cycloserine                                                                 |
| 34 | J04AB02 | Rifampicin                                                                  |
| 35 | J04AB04 | Rifabutin                                                                   |
| 36 | J04AB30 | Capreomycin                                                                 |
| 37 | J04AC01 | Isoniazid                                                                   |
| 38 | J04AC51 | "Isoniazid, Combinations"                                                   |
| 39 | J04AK01 | Pyrazinamide                                                                |
| 40 | J04AK02 | Ethambutol                                                                  |
| 41 | J04AM05 | "Rifampicin, Pyrazinamide and Isoniazid"                                    |
| 42 | J04BA01 | Clofazimine                                                                 |
| 43 | J04BA02 | Dapsone                                                                     |
| 44 | P01AB01 | Metronidazole                                                               |
| 45 | S01AA   | Antibiotics                                                                 |
| 46 | S01AA01 | Chloramphenicol                                                             |
| 47 | S01AA02 | Chlortetracycline                                                           |
| 48 | S01AA07 | Framycetin                                                                  |
| 49 | S01AA09 | Tetracycline                                                                |
| 50 | S01AA11 | Gentamicin                                                                  |
| 51 | S01AA12 | Tobramycin                                                                  |
| 52 | S01AA13 | Fusidic Acid                                                                |
| 53 | S01AA17 | Erythromycin                                                                |
| 54 | S01AA26 | Azithromycin                                                                |
| 55 | S01AA30 | Combinations of Different Antibiotics                                       |
| 56 | S01AB04 | Sulfacetamide                                                               |
| 57 | S01AB54 | "Sulfacetamide, Combinations"                                               |
| 58 | S01AE01 | Ofloxacin                                                                   |
| 59 |         |                                                                             |
| 60 |         |                                                                             |

1  
2  
3 S01AE03 Ciprofloxacin  
4 S01AE06 Gatifloxacin  
5 S01AE07 Moxifloxacin  
6 S01AE08 Besifloxacin  
7 S01CA01 Dexamethasone and Antiinfectives  
8 S01CA02 Prednisolone and Antiinfectives  
9 S01CA03 Hydrocortisone and Antiinfectives  
10 S01CA05 Betamethasone and Antiinfectives  
11 S01CA07 Fluorometholone and Antiinfectives  
12 S02AA01 Chloramphenicol  
13 S02AA14 Gentamicin  
14 S02AA30 "Antiinfectives, Combinations"  
15 S02CA02 Flumetasone and Antiinfectives  
16 S02CA03 Hydrocortisone and Antiinfectives  
17 S02CA05 Fluocinolone Acetonide and Antiinfectives  
18 S02CA06 Dexamethasone and Antiinfectives  
19 S03AA07 Ciprofloxacin  
20 S03AA30 "Antiinfectives, Combinations"  
21  
22  
23  
24  
25  
26  
27  
28  
29  
30  
31  
32  
33  
34  
35  
36  
37  
38  
39  
40  
41  
42  
43  
44  
45  
46  
47  
48  
49  
50  
51  
52  
53  
54  
55  
56  
57  
58  
59  
60

ATC=Anatomical Therapeutic Chemical (classification system)
